# 1 **MicroED structure of a protoglobin reactive carbene intermediate**

2 Emma Danelius<sup>1,2</sup>, Nicholas J. Porter<sup>3</sup>, Johan Unge<sup>1</sup>, Frances H. Arnold<sup>3</sup>, & Tamir Gonen<sup>1,2,4\*</sup>

3 1. Department of Biological Chemistry, University of California Los Angeles, 615 Charles E. Young Drive South, Los Angeles, CA 90095,  
4 USA.

5 2. Howard Hughes Medical Institute, University of California Los Angeles, Los Angeles, CA 90095, USA.

6 3. Division of Chemistry and Chemical Engineering, California Institute of Technology, 1200 East California Boulevard, MC 210-41,  
7 Pasadena, California 91125, USA.

8 4. Department of Physiology, University of California Los Angeles, 615 Charles E. Young Drive South, Los Angeles, CA 90095, USA.

9  
10 **Microcrystal electron diffraction (MicroED) is an emerging technique which has shown great potential for**  
11 **describing new chemical and biological molecular structures. [1] Several important structures of small**  
12 **molecules, natural products and peptides have been determined using *ab initio* methods. [2] However,**  
13 **only a couple of novel protein structures have thus far been derived by MicroED. [3, 4] Taking advantage**  
14 **of recent technological advances including higher acceleration voltage and using a low-noise detector in**  
15 **counting mode, we have determined the first structure of an *Aeropyrum pernix* protoglobin (*ApePgb*)**  
16 **variant by MicroED using an AlphaFold2 model for phasing. The structure revealed that mutations**  
17 **introduced during directed evolution enhance carbene transfer activity by reorienting an alphahelix of**  
18 ***ApePgb* into a dynamic loop making the catalytic active site more readily accessible. After exposing the**  
19 **tiny crystals to substrate, we also trapped the reactive iron-carbenoid intermediate involved in this**  
20 **engineered *ApePgb*'s new-to-nature activity, a challenging carbene transfer from a diazirine via a putative**  
21 **metallo-carbene. The bound structure discloses how an enlarged active site pocket stabilizes the carbene**  
22 **bound to the heme iron and, presumably, the transition state for formation of this key intermediate. This**  
23 **work demonstrates that improved MicroED technology and the advancement in protein structure**  
24 **prediction now enables investigation of structures that were previously beyond reach.**

## 25 **Main**

26 The identification of novel enzymes through protein engineering and directed evolution has made biocatalysis a  
27 competitive tool in modern organic synthesis. [5] Heme enzymes are particularly interesting due to their ability to  
28 form and transfer reactive carbene and nitrene intermediates to effect transformations not known in biology, and  
29 sometimes not even known in chemical catalysis. [6-8] Although many new-to-nature heme enzymes have been  
30 described, with a wide diversity in their synthetic products, the structural rationale behind these advancements is  
31 still missing. Describing the short-lived reactive intermediates of these reactions is of great interest for development  
32 of future biocatalysts, but this has proven very challenging. Using x-ray crystallography, only two carbene-bound  
33 intermediates have been reported: a carbene-bound *Rhodothermus marinus* cytochrome c variant [9] and a  
34 myoglobin heme-iron-carbenoid complex, which was observed in a non-reactive configuration. [10] In many cases,  
35 large, well-ordered crystals of the enzymes and their complexes are not accessible, so other methods able to  
36 handle much smaller crystals are needed.

37 MicroED is a cryo-electron microscopy (cryo-EM) method which has been developed during the last decade and  
38 has contributed many structures ranging from small molecules [11] and peptides [12] to both soluble [1] and  
39 membrane proteins. [13] In MicroED, electron diffraction data is collected from three-dimensional crystals using a  
40 transmission electron microscope (TEM) under cryogenic conditions. The crystals are typically a billionth the size  
41 of crystals used for X-ray diffraction, hence structures of new and important targets which have been out of reach  
42 due to challenges in crystal growth can be determined. [14] As in x-ray diffraction experiments, the intensities of  
43 the diffracted beams are directly recorded while the phases also used to model the crystal content need to be  
44 derived by other means. At atomic resolution, phases can be estimated directly from the intensities computationally  
45 by *ab initio* methods. Several novel small molecules, peptides and natural products have been solved by MicroED  
46 using *ab initio* phasing, including the sub-ångström structure of the prion proto-PrPSc peptide, [15] the antibiotic  
47 macrocycle thiostrepton [11] and the chemotherapeutic teniposide. [16] Further, radiation damage-induced  
48 phasing has been shown previously for MicroED data, [17] and isomorphous replacement, while theoretically  
49 possible, has yet to be demonstrated effectively. Recently, even for macromolecular structures, *ab initio* phasing  
50 was demonstrated with the sub-ångström resolution structure of triclinic lysozyme. [18] However, like with x-ray  
51 crystallography, the most common method to derive initial phases for macromolecular MicroED structure  
52 determination is molecular replacement (MR), which relies on a starting homologous model. The model is typically  
53 a similar protein with a known structure and the phases can be calculated after its position and orientation are  
54 found within the crystal. Due to the growing number of known structures deposited to the PDB as well as  
55 computational improvements, MR usage has increased from 50% in 2000 to 80% in 2022, and as such MR is the  
56 first choice in most cases for both x-ray crystallography and macromolecular MicroED. A couple of novel protein  
57 structures have been solved by MicroED with MR using the known structure of the wild-type homolog, including a  
58 novel mutant of the murine voltage-dependent anion channel at 3.1 Å resolution, [4] and the 3.0 Å structure R2lox,  
59 [3] but MR remains challenging in cases where structures of closely related homologues are not available.

60 Recent advances in protein structure prediction can enable MR where experimentally determined structures fail or  
61 otherwise are unavailable. The possibility to generate *ab initio* models without closely related homologues took a  
62 leap in the 14<sup>th</sup> Critical Assessment of Structure Prediction (CASP14) with the emergence of the deep learning  
63 method implemented in AlphaFold2. On the provided test sets, the peptide backbone atom positions could be  
64 predicted accurately to within 1 Å. This accuracy meets the requirement for MR when the diffracting resolution is  
65 better than 3 Å. [19] AlphaFold2 or RosettaMR have already been used to generate a starting model for  
66 successfully phasing x-ray data where no experimental structure was available. [20-22] However this approach  
67 has not been successfully applied to MicroED data.

68 Here, we present the previously unknown structure of *Aeropyrum pernix* protoglobin (*ApePgb*) determined by  
69 MicroED in two different states: resting state and with the reactive intermediate carbene bound following chemical  
70 activation of the reaction. The *ApePgb* structure described herein is an engineered variant for which no wild-type  
71 structure has been experimentally determined. The crystals formed as long and thin plates that were brittle and

72 challenging to isolate; despite significant efforts, the structure could not be obtained by synchrotron x-ray  
73 crystallography as very weak or no diffraction was observed. The structure was obtained using the latest MicroED  
74 technology including a cryo-TEM operating at 300 kV acceleration with parallel illumination, data collection on a  
75 direct electron detector operating in counting mode, and cryogenic preservation. The resting state structure was  
76 solved by molecular replacement against a computationally generated model from AlphaFold2. Following  
77 exposure of the crystals to reaction-like conditions, the same methodology was used to capture and determine the  
78 structure of the carbene-bound reactive intermediate of *ApePgb* by MicroED. This is to the best of our knowledge,  
79 the first example of a protein structure bound to an aryl carbene intermediate. This demonstrates the feasibility of  
80 using *ab initio* generated protein models for MR in MicroED at the resolution most well-represented by protein  
81 structures in the PDB, and that MicroED can now contribute novel protein structures, including those of short-lived  
82 reactive intermediates, that were previously beyond technological reach.

### 83 **Protoglobin structural interrogation**

84 Protoglobins are small dimeric heme proteins found in Archaea that are presumed to naturally function as gas  
85 binders/sensors. [23] These proteins have recently gained attention as engineered carbene transfer biocatalysts  
86 that can use either diazo compounds [24] or diazirines [25] as carbene precursors. Notably, the recent report of  
87 diazirine activation (Fig. 1) represents the first example of catalytic activation and subsequent carbene transfer  
88 from these species. Characterizing the structural details underlying these laboratory-evolved functions can provide  
89 deeper insights to guide the future engineering of such biocatalysts.

90 The *ApePgb* variant GLVRSQL described here was expressed and purified as reported previously. [25] Over 500  
91 conditions were screened for crystal formation identifying only one condition that yielded crystals. To interrogate  
92 the structural basis for the gain of cyclopropanation activity (Fig. 1), we attempted to determine the crystal structure  
93 by x-ray diffraction (XRD). However, the crystals were extremely thin and brittle plates that formed in large clusters  
94 (Fig. 2a), making it difficult to isolate a single and intact crystal for XRD. While screening, isolated crystals diffracted  
95 weakly to around 10–12 Å resolution (Fig. 2b), proving insufficient for any structural determination. Crystal  
96 optimization assays failed to yield better crystals for XRD despite significant effort. Instead, the plate-like crystals  
97 were prepared for MicroED as described below.

98 **MicroED grid preparation and diffraction screening.** To examine the crystals in the cryo TEM, the crystalline  
99 clusters were broken into smaller crystallite fragments by perturbation using a pipette, and the remaining crystal  
100 slurry was transferred to TEM grids inside of a vitrification robot at 4°C and 90% humidity. The grids were blotted  
101 from the back, vitrified by plunging into liquid ethane, and loaded into a Thermo Fisher Talos Arctica under  
102 cryogenic conditions for screening. The crystals appeared as thin sheets on the grids under low-magnification  
103 (Extended Data Fig. 1). Initial diffraction data were collected on a Ceta-D detector as a movie, and processed  
104 according to standard MicroED procedures. [26] However, these plate-like crystals adopted a preferred orientation

on the grid and they had the low symmetry P1 space group that resulted in low completeness and the overall data quality was insufficient for structural determination.

**MicroED data collection.** The data quality was dramatically improved by turning to higher acceleration voltage (300 kV) and parallel illumination at the Thermo Fisher Titan Krios TEM, and by collecting the data on the Falcon-4 direct electron detector operating in counting mode, which provides a significantly lower background and higher signal-to-noise ratio. [18] Whereas scintillator-based cameras, such as the Ceta-D used initially, record the data using integrating mode where the number of electrons is determined by the charge accumulated in a pixel during a readout-cycle, direct electron detectors such as the Falcon-4 can be used in counting mode where they detect individual electrons leading to increased accuracy and higher data quality. The higher acceleration voltage also allowed us to interrogate slightly thicker crystals, further enhancing the signal. Compared with the Ceta-D, the increased sensitivity of the Falcon-4 detector allows more information to be recorded for an identical exposure. In addition, with a faster readout more fine sliced data can be collected, further reducing the background for high resolution reflections. In this case, 840 frames were collected from each crystal on the Falcon 4, as compared with only 160 frames on the Ceta-D for the same exposure. The crystals were continuously rotated ( $0.15^\circ \text{ s}^{-1}$ ) in the electron beam during the exposure, covering the complete angular range of the stage. The merged data from these experiments yielded about 75% completeness with reasonable merging statistics even with P1 symmetry (Extended Data Table 1). The continuous-rotation MicroED data were converted to SMV format using an in-house software that is freely available. [27]

**MicroED data processing.** Data were indexed and integrated in XDS, as described previously for MicroED. [18] The integrated data were indexed in space group P1 with unit cell dimensions ( $a, b, c$ ) = 46.2 Å, 58.3 Å, 80.7 Å, and angles ( $\alpha, \beta, \gamma$ ) = 104.1°, 98.6°, 90.1°. Scaling and merging in AIMLESS [28] yielded a dataset to 2.1 Å resolution with an overall completeness of ~75% at a  $CC_{1/2}/R_{\text{merge}}$  of 97.2/0.18. Initially, phasing was attempted by MR using the structure of a homolog of *ApePgb* GLVRSQL, Y61A *Methanosarcina acetivorans* protoglobin (*MaPgb* Y61A; 56% identity, PDB 3ZJI). [29] However, when no reasonable solution was obtained with this starting model, we redirected our efforts towards predicted models; the sequence of *ApePgb* GLVRSQL was subjected to structure prediction with AlphaFold2 using the ColabFold environment. [30] The generated model was then used as a search model in Phaser to provide a preliminary phase solution for the MicroED data. The best solution with an LLG value of >1300 found 4 monomers in the unit cell. Atomic models were refined with electron scattering factors in Phenix Refine [31] using the automated solvent modeling. Several rounds of refinement resulted in a  $R_{\text{work}}/R_{\text{free}}$  of 0.19/0.22. In addition to the protein with the expected heme groups, the final model includes an imidazole molecule bound to the Fe of the heme in each chain, as well as about 170 water molecules.

**Structure Analysis *ApePgb* GLVRSQL.** The structure of *ApePgb* GLVRSQL (Fig. 3) has 7 mutations installed during directed evolution as compared to the wild-type sequence: C45G, W59L, Y60V, V63R, C102S, F145Q, and I149L. Most of the mutations are near the active site and affect the internal surface. The structure adopts an expanded version of the 3/3 helical sandwich typical of “classical” globins, with an additional N-terminal extension

140 followed by the Z-helix, helping the formation of the homodimer. [29] The dimer is built by the G- and H-helices  
141 creating a four-helix bundle for the two subunits. The alignment of the AlphaFold2 model and *ApePgb* GLVRSQL  
142 is presented in Fig. 3a, and the alignment of the closest homolog *MaPgb* Y61A with the sequence alignment in  
143 Extended Data Fig. 2. The *ab initio* model from AlphaFold2 resulted in slightly smaller overall differences to *ApePgb*  
144 (r.m.s.d. 0.50–0.55 Å versus 0.65–0.7 Å for *MaPgb* Y61A). When compared to the standard protoglobin fold  
145 observed in *MaPgb* Y61A, the major difference is the disruption of the B helix between residues 60–70. These  
146 residues adopt a rigid helical conformation in AlphaFold2 and *MaPgb*, but are found to be restructured as a loop  
147 in *ApePgb* GLVRSQL (Fig. 3b). Given that the Y61A mutation in *MaPgb* does not alter the helical conformation of  
148 this region and there is no substantial deviation in the wild-type sequences before the B helix terminus, it is  
149 reasonable that this helix would still be present in wild-type *ApePgb*. For the *ApePgb* GLVRSQL structure with four  
150 chains (A–D), the backbone of the disrupted B helix 60–70 is observed for chains A–C, but the density is  
151 substantially weaker than surrounding regions. In chain D, residues of the disrupted B helix 60–70 could not be  
152 modeled. The weaker electrostatic potential map, the slight differences between chains, and the *B*-factors of the  
153 loop (Extended Data Fig. 3) suggest that this region is flexible and thus might be able to adopt different  
154 conformations in solution. It is likely that the observed structural change stems from the mutation V63R which  
155 resulted in a 14-fold boost in product yield for the cyclopropanation reaction (Fig. 1), the largest improvement from  
156 any single mutation during enzyme engineering. In *MaPgb*, V63 is pointing towards the active site, where the  
157 natural substrate is two atoms only. The inclusion of the much bulkier arginine residue in this position is difficult to  
158 model within the structure of *ApePgb* GLVRSQL without major rearrangements. The AlphaFold2-predicted model  
159 of *ApePgb* GLVRSQL incorrectly orients R63 into the enzyme active site (Fig. 3b), similar to the *MaPgb* structure.  
160 The limited space at the active site together with repulsion effect between the positively charged iron and arginine  
161 could be the reasons for breaking up the helical conformation in this region to produce a conformation where R63  
162 is instead positioned at the surface pointing outwards (Fig. 3b). Thus, the effects of unfavorable steric and  
163 electrostatic interactions between the heme and positively-charged arginine side chain are presumed to drive the  
164 rearrangement of residues 60–70, truncating the B helix in this variant and expanding the active site cavity (Figs.  
165 3 c and d).

166 The solvent-inaccessible heme is buried in the protein matrix (Figs. 3c and d). This feature is in contrast to most  
167 members of the globin family structures where about 30% of the heme would be surface accessible. [23] In natural  
168 protoglobins, the diatomic substrates access the active site through two small orthogonal apolar tunnels defined  
169 at the interfaces of the B/E and B/G helices. In *ApePgb* GLVRSQL, however, the rearrangement of the final turns  
170 of helix B obstructs the B/E tunnel through interactions with the main chain and the W62 side chain, resulting in a  
171 broadening of the B/G tunnel (Fig. 3d). This larger tunnel is presumed to increase diffusion in the active site and  
172 allow the entry of larger ligands than the natural diatomic substrates, such as the diazine and acrylate substrates  
173 targeted in directed evolution (Fig. 1). In fact, the bulky benzene moiety is too large to fit into the tunnels present  
174 in the AlphaFold2 model, and it seems likely that the drastic expansion of the access pathway is necessary for  
175 passage of the substrate. Molecular dynamics simulations suggest that F145 controls the accessibility of B/G

tunnel, though this has yet to be validated experimentally. [23] The corresponding mutated amino acid Q145, as well as L149, in the engineered *ApePgb* line the expanded tunnel and could reasonably affect the affinity or orientation of the substrate. The F145Q mutation remained throughout directed evolution of the enzyme, despite screening of mutations at this position, and I149L doubled the biosynthetic yield of cyclopropane **3**, underscoring the importance of these mutations to the new activity. The mutations G45 and S102 are both located at the surface of the protein. These mutations remove the cysteine residues in the wildtype sequence. Since these cysteines are located close to one another in space in *MaPgb* (5.6 Å C $\alpha$ -C $\alpha$  separation), they are potentially capable of forming a disulfide between the A and E helices in wild type *ApePgb*.

**Data collection of substrate-bound *ApePgb* GLVRSQL.** Nanocrystals allow efficient and homogeneous diffusion of small molecules, giving a fast and convenient way for the determination of ligand-bound complexes, in contrast to a time-consuming and often inaccessible co-crystallization approach. This is especially essential for ligands or intermediates with a limited half-life in solution. Hence, MicroED shows potential for structural determination of reactive intermediates in enzyme catalyzed reactions. To investigate the reactive intermediate of the reaction shown in Fig. 1, the crystal fragments were soaked with carbene precursor **2** (phenyldiazirine, Fig. 1) according to previously described protocols. [9] Following 15 minutes of soaking and the addition of sodium dithionite, the grids were prepared and data were collected as described above. The integrated data in this case were indexed in space group P121 with unit cell dimensions (a, b, c) = 58.15 Å, 45.89 Å, 71.71 Å, and angles ( $\alpha$ ,  $\beta$ ,  $\gamma$ ) = 90.00°, 105.42°, 90.00°. Scaling and merging in AIMLESS [28] to 2.5 Å resolution gave a dataset with overall completeness of 72% and an CC<sub>1/2</sub>/R<sub>merge</sub> of 0.97/0.23. The data were phased by molecular replacement in Phaser using chain A of the *ApePgb* GLVRSQL described here. The solution found was top ranked with an LLG of 4002, containing 2 monomers in the asymmetric unit. The structure was further refined in Phenix Refine [31] to an R<sub>work</sub>/R<sub>free</sub> of 0.23/0.28. The final model was derived by altering the angle and distance describing the carbene interaction until the lowest R<sub>free</sub> value was obtained.

**Structure analysis of the metallo-carbene structure.** Carbene transfer from a diazirine is thought to involve the formation of a putative reactive iron heme-carbene intermediate which transfers the carbene to a second substrate, followed by product release and regeneration of the catalyst. [25] In the metallo-carbene structure described here, the observed overall fold for the carbene-bound *ApePgb* GLVRSQL is the same as for the unbound, with the only small differences observed in the 60–70 loop region (Fig. 4a). Interestingly, the MicroED density of this loop is a little more defined than in unbound *ApePgb*, which might indicate that the loop rigidifies upon substrate binding. In particular, residue W62 is better described by the density. *ApePgb* GLVRSQL was engineered for activation of a benzene-substituted diazirine (Fig. 1), a much larger molecule than any natural protoglobin substrate. As discussed above, increased diffusion into and out of the active site and accommodation of larger substrates near the heme cofactor likely play a significant role in the improved activity of *ApePgb* GLVRSQL. For example, amino acids L59 and V60 are both located in the active site with their side chains pointing towards the binding area on the distal side of the heme group (Fig. 4b). Both the selected mutations W59L and Y60V introduce substantially

211 smaller side chains, forming a larger cavity between the heme and the B helix. The main chain conformations for  
212 residues 59 and 60 in *ApePgb* GLVRSQL and the AlphaFold2 model are similar, and modeling of the original  
213 residues, W59 and Y60, suggests significant steric clashes of such residues with the aryl ring of the carbene.  
214 Further, the side chain of F93 adjusts slightly to form a pi-stacking interaction with the phenyl group of the carbene  
215 (Fig. 4b). These intermolecular interactions likely stabilize the binding and orientation of the phenyl carbene, each  
216 contributing to the improved reactivity gained through evolution. The observed MicroED density and the occupancy  
217 of the carbene suggests a single carbene species as the dominant form, where the rate of carbene formation is  
218 greater than the rate of carbene decay in absence of the second substrate.

219 While it is clear that mutations in *ApePgb* GLVRSQL have reshaped the active site, the heme exhibits a similar  
220 ruffled distortion to that observed in *MaPgb* and other protoglobins (Extended Data Fig. 2). [23] Out-of-plane  
221 distortions to the porphyrin ring are known to alter the electrostatic and ligand-binding properties of the bound iron,  
222 [32] but the specific changes associated with any specific distortion are challenging to measure and remain  
223 unclear. When comparing the *ApePgb* GLVRSQL with the carbene-bound intermediate, the ruffling of the heme is  
224 changed by up to 0.5 Å (Fig. 4b). The position of the carbene that resulted in the lowest  $R_{\text{free}}$  in similar refinement  
225 rounds is found at a distance of 1.74 Å (Fe – C1) and at an angle of about 128 degrees (Fe – C1 – C2). These  
226 values are comparable to the previously determined protein structure describing a heme–carbene complex, [9] as  
227 well as an iron porphyrin X-ray structure in which a diaryl-carbene is bound to the Fe atom. [33] When comparing  
228 the B/G helix interfaces of the unbound and carbene bound states, it seems that binding the substrate has closed  
229 the passage slightly (Fig. 4c), which coincides with the observation that the residues around the active site and at  
230 the solvent tunnel are less dynamic when the substrate is bound. This change is also observable in the *B*-factor  
231 gradient (Extended Figure 3). The efficiency of enzymes in accelerating chemical reactions is explained by both  
232 their ability to pre-organize the active site for transition state stabilization [34] as well as sample the conformational  
233 ensemble required for substrate binding, reaction, and product release. [35] For this, some inherent flexibility of  
234 the enzyme structure is required. The increase in flexibility observed for *ApePgb* GLVRSQL can enable the  
235 enzyme to adopt the conformations important for the different processes. The following observed rigidification  
236 upon binding the substrate might function to pre-organize the active site for transition state stabilization. Notably,  
237 donor-substituted carbenes are known to be short-lived and highly reactive. [36] That such a sensitive intermediate  
238 can be trapped and observed by MicroED underscores the value of this technique and the insights it can provide  
239 into such systems. The homogeneity of the bound intermediate within the crystal is likely enhanced by the improved  
240 diffusion and smaller sample size inherent to microcrystalline samples, providing better context for the atomic  
241 details underlying the enzyme chemistry. The atomic details underlying the engineered carbene transfer chemistry  
242 developed in these protoglobins will serve to guide future enzyme engineering, leading to further development of  
243 future biocatalysts.

244 In conclusion, comparisons to both the experimental structure of the related *MaPgb* as well as the predicted  
245 AlphaFold2 model show good overall agreement. It highlights the significance of the disruption introduced into the

246 B helix region of the protoglobin fold and implicate the V63R mutation as a factor in this structural change. The  
247 broadening of the active site access tunnel relates well to the increased reaction rates observed for this variant. In  
248 modern crystallography, most protein structures are phased by molecular replacement using a related model from  
249 the Protein Structure Databank. To date, structure determination using MicroED in the absence of a reasonable  
250 search model has been set back due to the lack of experimental phasing techniques analogous to anomalous  
251 scattering in X-ray crystallography. We present the determination of a novel structure that could be solved by  
252 molecular replacement made possible by an *ab initio* generated model from AlphaFold2 in concert with higher  
253 quality data accessible due to advanced detector development and a high voltage electron microscope. We further  
254 used this technology to investigate the formation of the reactive metallo-carbene and describe the first structure of  
255 an aryl-carbene intermediate in a protein structure. As the crystals used in this study were not amenable for X-ray  
256 diffraction, this example adds an important tool for the determination of highly-sought protein structures.

## 257 **References**

- 258 1. Nannenga, B. L., Gonen, T. The cryo-EM method microcrystal electron diffraction (MicroED). *Nat.*  
259 *Methods* **16**, 369–379 (2019).
- 260 2. Danelius, E., Halaby, S., van der Donk, W. A., Gonen, T. MicroED in natural product and small molecule  
261 research. *Nat. Prod. Rep.* **38**, 423–431 (2021).
- 262 3. Xu, H., et al. Solving a new R2lox protein structure by microcrystal electron diffraction. *Sci. Adv.* **5**,  
263 eaax4621 (2019).
- 264 4. Martynowycz, M. W., Khan, F., Hattne, J., Abramson J., Gonen, T., MicroED structure of lipid-embedded  
265 mammalian mitochondrial voltage-dependent anion channel. *Proc. Natl. Acad. Sci.* **117**, 32380–32385  
266 (2020).
- 267 5. Bell, E. L., et al. Biocatalysis. *Nat. Rev. Methods Primers* **1**, 46 (2021).
- 268 6. Yang, Y., Arnold, F. H. Navigating the unnatural reaction space: Directed evolution of heme proteins for  
269 selective carbene and nitrene transfer. *Acc. Chem. Res.* **54**, 1209–1225 (2021).
- 270 7. Miller, D. C., Lal, R. G., Marchetti, L. A., Arnold, F. H. Biocatalytic one-carbon ring expansion of aziridines  
271 to azetidines via a highly enantioselective [1,2]-stevens rearrangement. *J. Am. Chem. Soc.* **144**, 4739–  
272 4745 (2022).
- 273 8. Athavale, S. V., et al. Enzymatic nitrogen insertion into unactivated C–H bonds. *J. Am. Chem. Soc.*  
274 (2022). Article ASAP DOI: 10.1021/jacs.2c08285.
- 275 9. Lewis, R. D., et al. Catalytic iron-carbene intermediate revealed in a cytochrome *c* carbene transferase.  
276 *Proc. Natl Acad. Sci.* **115**, 7308–7313 (2018).
- 277 10. Hayashi, T., et al. Capture and characterization of a reactive haem–carbenoid complex in an artificial  
278 metalloenzyme. *Nat. Catal.* **1**, 578–584 (2018).
- 279 11. Jones, C. G., et al. The CryoEM method MicroED as a powerful tool for small molecule structure  
280 determination. *ACS Cent. Sci.* **4**, 587–1592 (2018).



- 281 12. Chi, P.T., et al., Use of a scaffold peptide in the biosynthesis of amino acid derived natural products.  
282 *Science* **365**, 280–284 (2019).
- 283 13. Gallenito, M. J., Gonen, T. Studying membrane proteins with MicroED. *Biochem. Soc. Trans.* **50**, 231–  
284 239 (2022).
- 285 14. Clabbers, M. T. B., Shiriaeva, A., Gonen, T. MicroED: conception, practice and future opportunities.  
286 *IUCrJ* **9**, 169–179 (2022).
- 287 15. Gallagher-Jones, M., et al. Sub-ångström cryo-EM structure of a prion protofibril reveals a polar clasp.  
288 *Nat. Struct. Molec. Biol.* **25**, 131–134 (2018).
- 289 16. Bruhn, J. F., et al. Small molecule microcrystal electron diffraction for the pharmaceutical industry–  
290 lessons learned from examining over fifty samples. *Front. Mol. Biosci.* **8**, 648603 (2021).
- 291 17. Martynowycz, M. W., Hattne J., Gonen T. Experimental phasing of microed data using radiation damage.  
292 *Structure* **28**, 458–464 (2020).
- 293 18. Martynowycz, M.W., Clabbers, M. T. B., Hattne, J., Gonen, T. Ab initio phasing macromolecular  
294 structures using electron-counted MicroED data. *Nat. Methods* **19**, 724–729 (2022).
- 295 19. McCoy, A. J., Sammito, M. D., Read R. J. Implications of AlphaFold2 for crystallographic phasing by  
296 molecular replacement. *Acta Crystallogr. D* **78**, 1–13 (2022).
- 297 20. Hotta, K., et al. Conversion of a disulfide bond into a thioacetal group during echinomycin biosynthesis.  
298 *Angew. Chem. Int. Ed.* **53**, 824–828 (2014).
- 299 21. Sjodt, M., et al. Structure of the peptidoglycan polymerase RodA resolved by evolutionary coupling  
300 analysis. *Nature* **556**, 118–121 (2018).
- 301 22. Barbarin-Bocahu, I., Graille, M. Artificial intelligence to solve the X-ray crystallography phase problem: a  
302 case study report. bioRxiv. 12.14.472726 (2021).
- 303 23. Pesce, A., Bolognesi, M., Nardini, M. Chapter three - Protoglobin: structure and ligand-binding properties.  
304 *Advances in Microbial Physiology*, 79–96 (Academic Press. 2013).
- 305 24. Knight, A. M., et al. Diverse engineered heme proteins enable stereodivergent cyclopropanation of  
306 unactivated alkenes. *ACS Cent. Sci.* **4**, 372–377 (2018).
- 307 25. Porter, N. J., Danelius, E., Gonen, T., Arnold, F. H. Biocatalytic carbene transfer using diazirines. *J. Am.*  
308 *Chem. Soc.* **144**, 8892–8896 (2022).
- 309 26. Danelius, E., Gonen, T. Protein and small molecule structure determination by the cryo-EM method  
310 MicroED. *Structural Proteomics: High-Throughput Methods*, p. 323–342 (Springer US 2021).
- 311 27. Hattne J., et al. MicroED data collection and processing. *Acta Crystallogr. A Found Adv.* **71**, 353–360  
312 (2015). MicroED conversion tool: <https://cryoem.ucla.edu/downloads>.
- 313 28. Evans, P. R., Murshudov, G. N. How good are my data and what is the resolution? *Acta Crystallogr. D*  
314 **69**, 1204–1214 (2013).
- 315 29. Pesce, A., et al. Structure and haem-distal site plasticity in methanosarcina acetivorans protoglobin.  
316 *PLOS ONE* **8**, e66144 (2013).
- 317 30. Mirdita, M., et al. ColabFold: making protein folding accessible to all. *Nat. Methods* **19**, 679–682 (2022).

- 318 31. Afonine, P. V., et al. Towards automated crystallographic structure refinement with phenix.refine. *Acta*  
319 *Crystallogr. D* **68**, 352–367 (2012).
- 320 32. Bikiel, D. E., et al. Role of heme distortion on oxygen affinity in heme proteins: the protoglobin case. *J.*  
321 *Phys. Chem. B* . **114**, 8536–8543 (2010).
- 322 33. Li, Y., Huang, J., Zhou, Z., Che, C., You, X. Remarkably stable iron porphyrins bearing nonheteroatom-  
323 stabilized carbene or (alkoxycarbonyl)carbenes: Isolation, X-ray crystal structures, and carbon atom  
324 transfer reactions with hydrocarbons. *J. Am. Chem. Soc.* **124**, 13185–13193 (2002).
- 325 34. Warshel, A., et al. Electrostatic basis for enzyme catalysis. *Chem. Rev.* **106**, 3210–3235 (2006).
- 326 35. Boehr, D. D., Nussinov, R., Wright, P. E. The role of dynamic conformational ensembles in biomolecular  
327 recognition. *Nat. Chem. Biol.* **5**, 789–796 (2009).
- 328 36. Zhu, D., Chen, L., Fan, H., Yao, Q., Zhu, S. Recent progress on donor and donor–donor carbenes.  
329 *Chem. Soc. Rev.* **49**, 908–950 (2020).

330  
331  
332

### 333 Figures

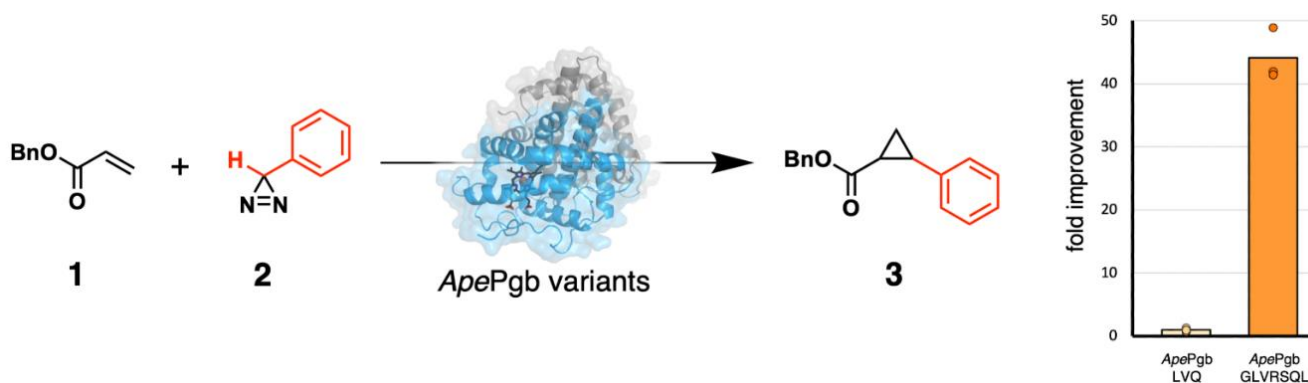

334

335 **Figure 1.** Directed evolution of *A. pernix* protoglobin (ApePgb) converted this gas-binding protein into an enzyme catalyzing  
336 cyclopropanation of benzyl acrylate **1** using phenyldiazirine **2** as a carbene source to generate cyclopropane **3**. The installation of the 4  
337 mutations shown here, introduced during directed evolution, resulted in a >40-fold increase in activity (right; ApePgb LVQ = ApePgb W59L  
338 Y60V F145Q & ApePgb GLVRSQL = ApePgb C45G W59L Y60V V63R C102S F145Q I149L). The reaction scope was further extended to  
339 include N–H and Si–H insertion reactions. [18]

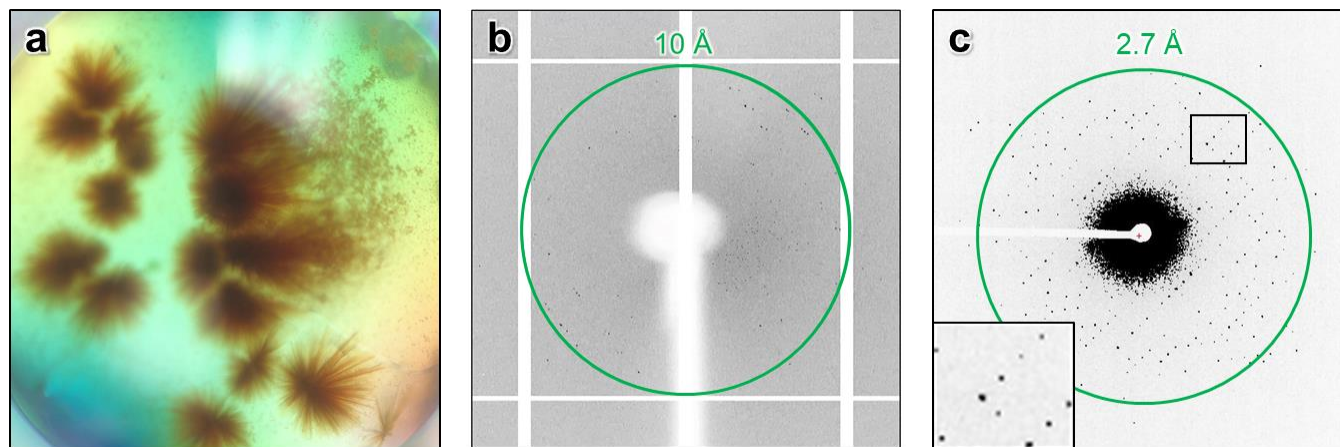

340

341

342

**Figure 2.** a) The crystal drop of *ApePgb* GLVRSQL in 0.4 M sodium phosphate monobasic / 1.6 M potassium phosphate dibasic, 0.1 M imidazole (pH 8.0), 0.2 M NaCl. (b) XRD, single exposure. (c) MicroED, single exposure. Green circle indicates levels of resolution.

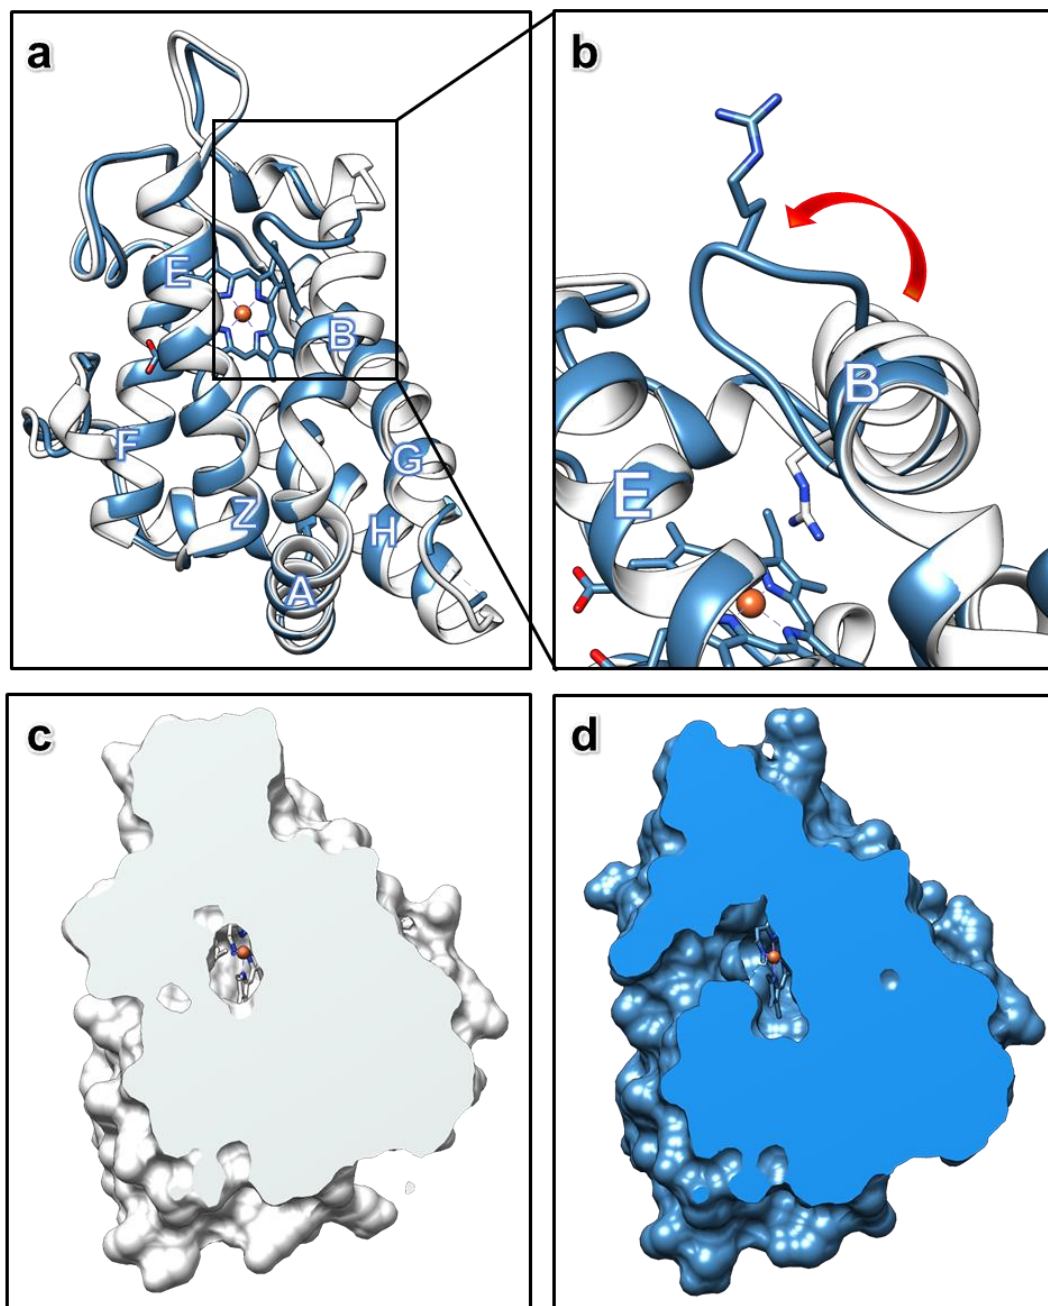

343

344 **Figure 3.** MicroED structure of *ApePgb* GLVRSQL: a) Superposition of the structures of *ApePgb* GLVRSQL (blue) with the AlphaFold2  
345 model (white), with helices labeled according to convention for the protoglobin fold. b) Close-up of the structures of *ApePgb* GLVRSQL  
346 (blue) with the AlphaFold2 model (white) showing the unwinding of the B helix into a dynamic loop, creating a larger cavity around the active  
347 site with increased access to the heme. c) and d) Clipped surface of the AlphaFold2 model (white) and *ApePgb* GLVRSQL (blue) showing  
348 the effects of the unwinding of the helix and the rearrangement of the B/G interface leading to easier substrate access from outside in  
349 addition to the increased space available at the heme.

350

351

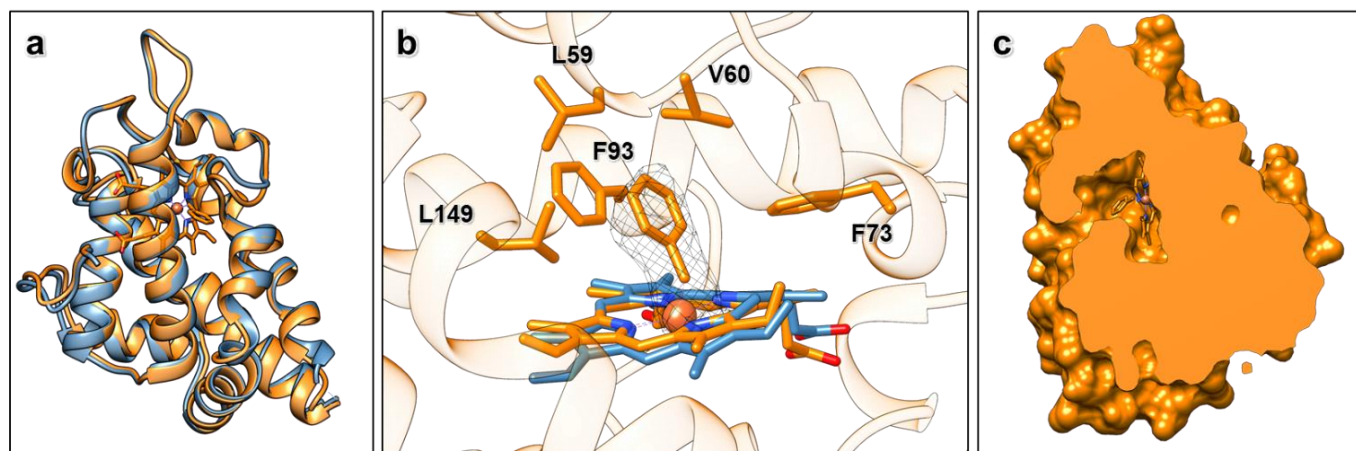

352

353 **Figure 4.** MicroED structure of carbene-bound *ApePgb* GLVRSQL: a) Superposition of the structures of *ApePgb* GLVRSQL (blue) the  
354 carbene-bound intermediate (orange). b) Polder omit map ( $2.5\sigma$ ) for the metallo-carbene complex (orange), also including the heme from  
355 unbound *ApePgb* GLVRSQL (blue) for comparison. c) Clipped surface of the carbene-bound *ApePgb* GLVRSQL, showing a decrease in  
356 the size of the B/G channel as compared to the unbound *ApePgb* GLVRSQL.

## 357 **Methods**

358 *Protein crystallization.* The crystal drops used for this study were setup using 0.5  $\mu\text{L}$  of 20 mg/mL protein (50 mM  
359 potassium phosphate (pH 8.0), 150 mM NaCl) and 2.5  $\mu\text{L}$  precipitant (0.4 M sodium phosphate monobasic / 1.6  
360 M potassium phosphate dibasic, 0.1 M imidazole (pH 8.0), 0.2 M NaCl). Large crystal clusters appeared after 1-3  
361 days.

362 *Grid preparation, *ApePgb* GLVRSQL.* Quantifoil R 2/2 - 200 copper mesh grids were glow discharged (30 s, 15  
363 mA, negative polarity) and transferred to a Leica GP2 vitrification robot with the sample chamber set to 90% relative  
364 humidity and 4  $^{\circ}\text{C}$ . The crystal drop was diluted with 15  $\mu\text{L}$  of mother liquor and the needle-like crystals were  
365 broken into smaller pieces by gently pipetting into the drop. The resulting protein crystal slurry (2  $\mu\text{L}$ ) was pipetted  
366 onto the carbon side of the grid in the vitrification chamber and allowed to incubate for 20 seconds. The grid was  
367 blotted from the back for 30 seconds, plunged into liquid ethane and transferred to liquid nitrogen for storage.

368 *Grid preparation, carbene-bound *ApePgb* GLVRSQL.* The crystal drop was diluted with 10  $\mu\text{L}$  3-phenyl-3H-  
369 diazirine dissolved in the crystallization condition, making a final concentration of 30  $\mu\text{M}$  3-phenyl-3H-diazirine.  
370 The needle-like crystals were broken into smaller pieces by gently pipetting into the drop, and the resulting slurry  
371 was left at room temperature for 15 minutes. Quantifoil R 2/2 - 200 copper mesh grids were glow discharged (30  
372 s, 15 mA, negative polarity) and transferred to a Leica GP2 vitrification robot with the sample chamber set to 90%  
373 relative humidity and 4  $^{\circ}\text{C}$ . Following addition of 50 mM sodium dithionite to the drop, 2  $\mu\text{L}$  of the protein crystal  
374 slurry soaked with 3-phenyl-3H-diazirine was pipetted onto the carbon side of the grid in the vitrification chamber  
375 and allowed to incubate for 20 seconds. The grid was blotted from the back for 30 seconds, plunged into liquid  
376 ethane and transferred to liquid nitrogen for storage.

377 *Data collection.* The grids were loaded into a Thermo Fisher Scientific Titan Krios G3i transmission electron  
378 microscope (300 kV) under cryogenic conditions. Following screening for crystals at low-magnification in imaging  
379 mode, using the Thermo Scientific EPU-D software, identified crystals which appeared as thin rectangular sheets  
380 on the grid were tested for initial diffraction using 1 second single exposure in diffraction mode. Well diffracting  
381 crystals were setup for data collection; the crystals were brought to eucentric height, and a single 1 second  
382 exposure was repeated at the starting tilt angle. The MicroED data were collected using a Falcon 4 direct electron  
383 detector in counting mode as a movie with continuous rotation of the stage at a rate of  $0.15^\circ \text{ s}^{-1}$ , with the selected  
384 area aperture of  $100 \mu\text{m}$  and the beam stop inserted. Frames were read out every 0.5 s giving MRC datasets of  
385 840 images, corresponding to a  $60^\circ$  wedge from each crystal. The total wedge that was collected over several  
386 datasets corresponded to approximately  $+70^\circ$  to  $-70^\circ$ .

387 *Data processing and refinement.* The MRC files were converted to individual frames in SMV format using the freely  
388 available MicroED software (<https://cryoem.ucla.edu/>). The reflections were indexed and integrated in XDS. The  
389 generated datasets were scaled in AIMLESS and phased by molecular replacement in Phaser. For *ApePgb*  
390 GLVRSQ a structure of predicted by AlphaFold2 through the ColabFold environment was used as a search  
391 model, and for the carbene-bound structure Chain A of *ApePgb* GLVRSQ was used as search model. All models  
392 were refined in phenix.refine using electron-scattering factors. The statistics are given in Extended Data Tables 1  
393 and 2.

## 394 **Acknowledgements**

395 E.D. thanks The Wenner-Gren Foundations for their support through the Wenner-Gren Postdoctoral Fellowship.  
396 This study was supported by the National Institutes of Health P41GM136508. The Gonen laboratory is supported  
397 by funds from the Howard Hughes Medical Institute.

398 N.J.P. thanks Merck and the Helen Hay Whitney Foundation for their support through the Merck-Helen Hay  
399 Whitney Foundation Postdoctoral Scholarship. This publication is based on work supported by the United States  
400 Army Research Office under Contract W911NF-19-0026 for the Institute for Collaborative Biotechnologies and the  
401 G. Harold and Leila Y. Mathers Charitable Foundation.

## 402 **Author contributions**

403 N.P. conducted protein expression and crystallization experiments. E.D. prepared the samples and conducted  
404 MicroED data collection. E.D. and J.U. analyzed the data and solved the structures. E.D., J.U., N.P, F.A, and T.G.  
405 took part in preparation of the manuscript.

## 406 **Competing interests**

407 The authors declare no competing interests.

409 **Additional information**

410 Correspondence and requests for materials should be addressed to Tamir Gonen [tgonen@g.ucla.edu](mailto:tgonen@g.ucla.edu)

411 **Extended Data tables**

412 **Extended Data Table 1.** MicroED Data collection and refinement statistics, *ApePgb* GLVRSQ.

| <b>Integration</b>                          |                   |
|---------------------------------------------|-------------------|
| Wavelength (Å)                              | 0.0197            |
| Acceleration voltage                        | 300 kV            |
| Temperature                                 | -196°C            |
| Space group                                 | P1                |
| Unit cell (a, b, c) (Å)                     | 46.2, 58.3, 80.7  |
| Unit cell ( $\alpha = \beta = \gamma$ ) (°) | 104.1, 98.6, 90.1 |
| R <sub>merge</sub>                          | 0.18              |
| I/ $\sigma$ (I)                             | 6.96 (2.4)        |
| Completeness (%)                            | 74                |
| CC <sub>1/2</sub>                           | 97.2              |
| Wilson <i>B</i> -factor (Å <sup>2</sup> )   | 8.58              |
| <b>Refinement</b>                           |                   |
| Resolution range (Å)                        | 24.47 - 2.10      |
| Total reflections (no.)                     | 33825             |
| R <sub>work</sub>                           | 0.188             |
| R <sub>free</sub>                           | 0.224             |
| No. of atoms                                | 6547              |
| Protein                                     | 6160              |
| Ligand/ion                                  | 192               |
| Water                                       | 195               |
| <i>B</i> -factors                           |                   |
| Protein                                     | 27.25             |
| Ligand/ion                                  | 19.81             |
| Water                                       | 17.74             |
| R.m.s. deviation                            |                   |
| Bonds length (Å)                            | 0.013             |
| Bond angles (°)                             | 1.464             |

413

414

415

416

417

418

419

420

421

422 **Extended Data Table 2.** MicroED Data collection and refinement statistics, *ApePgb* GLVRSQL metallo-carbene complex.

| Integration                                     |                      |
|-------------------------------------------------|----------------------|
| Wavelength (Å)                                  | 0.0197               |
| Acceleration voltage                            | 300 kV               |
| Temperature                                     | -196°C               |
| Space group                                     | P121                 |
| Unit cell (a, b, c) (Å)                         | 58.15, 45.89, 71.71  |
| Unit cell ( $\alpha$ , $\beta$ , $\gamma$ ) (°) | 90.00, 105.42, 90.00 |
| R <sub>merge</sub>                              | 0.18                 |
| I/ $\sigma$ (I)                                 | 5.73 (2.6)           |
| Completeness (%)                                | 70                   |
| CC1/2                                           | 96.2                 |
| Wilson B-factor (Å <sup>2</sup> )               | 6.8                  |
| Refinement                                      |                      |
| Resolution range (Å)                            | 24.36 - 2.50         |
| Total reflections (no.)                         | 40105                |
| R <sub>work</sub>                               | 0.235                |
| R <sub>free</sub>                               | 0.284                |
| No. of atoms                                    | 3228                 |
| Protein                                         | 3104                 |
| Ligand/ion                                      | 100                  |
| Water                                           | 64                   |
| <i>B</i> -factors                               |                      |
| Protein                                         | 20.81                |
| Ligand/ion                                      | 16.43                |
| Water                                           | 16.34                |
| R.m.s. deviation                                |                      |
| Bonds length (Å)                                | 0.005                |
| Bond angles (°)                                 | 0.877                |

423

424

425 **Extended Data Figures**

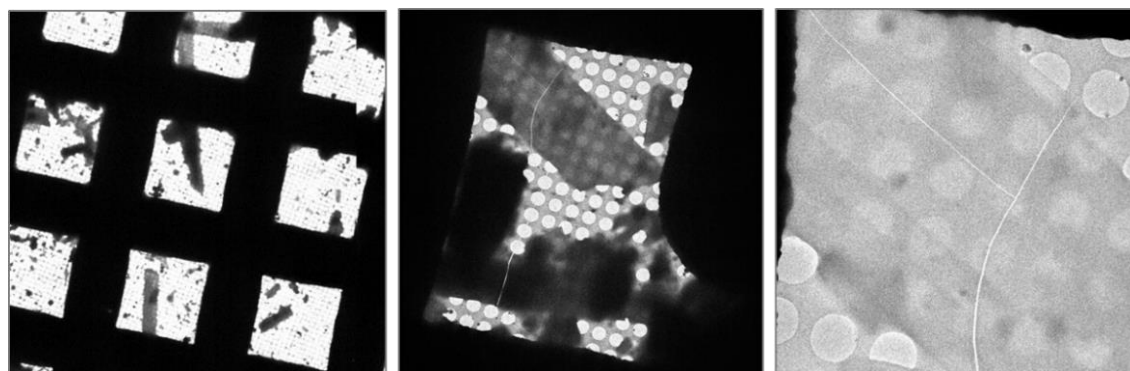

426

427 **Extended Figure 1.** The thin plate clusters of *ApePgb* GLVRSQL, in the TEM at 210x, 940x, and 3400x magnification.

428



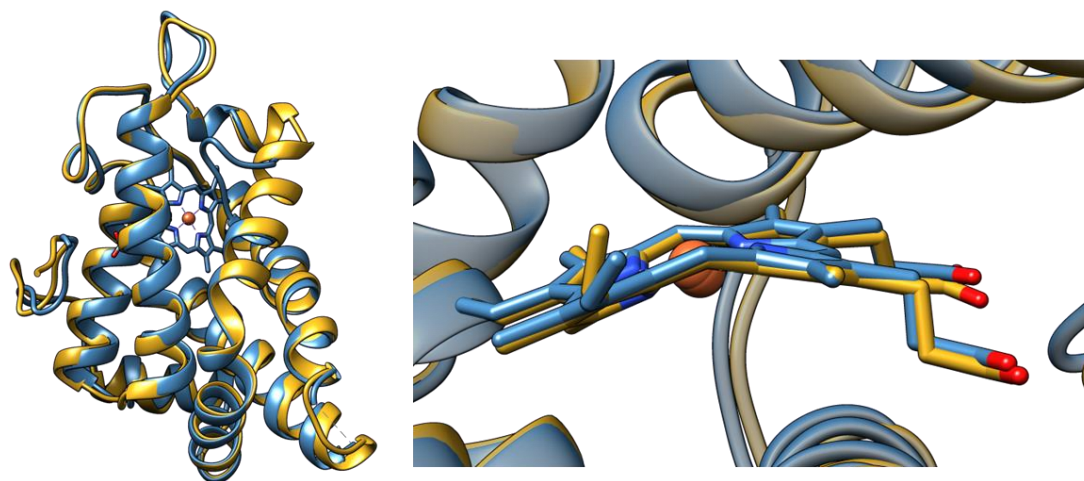

CLUSTAL O(1.2.4) multiple sequence alignment

```

ApePgb 6 -----IPGYDYGRVEKS-PITDLEFDLLKKTVMLGKEDVMYLKKAGDVLKDQVDEILDL 59
2VEB 1 MSVEKIPGYTYGETENRAPFNLEDLKLLEAVMFTAEDDEEYIQKAGEVLEDQVEEILDTW 60
      **** *.**.*: *:. :.***:***: :* *:.***:***:***:***
ApePgb 60 VGWRASNEHLIYFSNPDTGEPIKEYLERVRARFGAWILDTSRDYNREWLDYQYEVGLR 119
2VEB 61 YGFVGSHPHLLYYFTSPD-GTPNEKYLAAVRKRFSRWILDTSNRSYDQAWLDYQYEIGLR 119
      *: .*: **:*:*:.** * * ::** ** ** *:*:*:.*.*: *:*:*:*:*
ApePgb 120 HHRSKKGVTDGVRTVPHIPLRYLIAQIYPLTATIKPFLAKKGGSPEDIEGMYNAWFKSVV 179
2VEB 120 HHRTKKNQTDNVESVPNIGYRYLVAFIYPITATMKPFLARKGHTPEEVEKMYQAWFKATT 179
      ***:*.* **.*:*** * **:*:* **:*:*:*:*:*:*:* *:*:* **:*:*:*:.
ApePgb 180 LQVAIWSHPYTKENDW 195
2VEB 180 LQVALWSYPYVKYGDF 195
      ***:*:*:*.* * .*:

```

429

430

431

432

433

434

435

**Extended Figure 2.** Sequence alignment and superposition of *ApePgb* GLVRS**SQL** (blue) and the closest homologue protoglobin (Y61A *Methanosarcina acetivorans* protoglobin (*MaPgb*), PDB 3ZJI, yellow). The mutations introduced through directed evolution are highlighted in yellow. The close-up of the heme shows the similar ruffled distortion observed in *MaPgb* and other protoglobins.

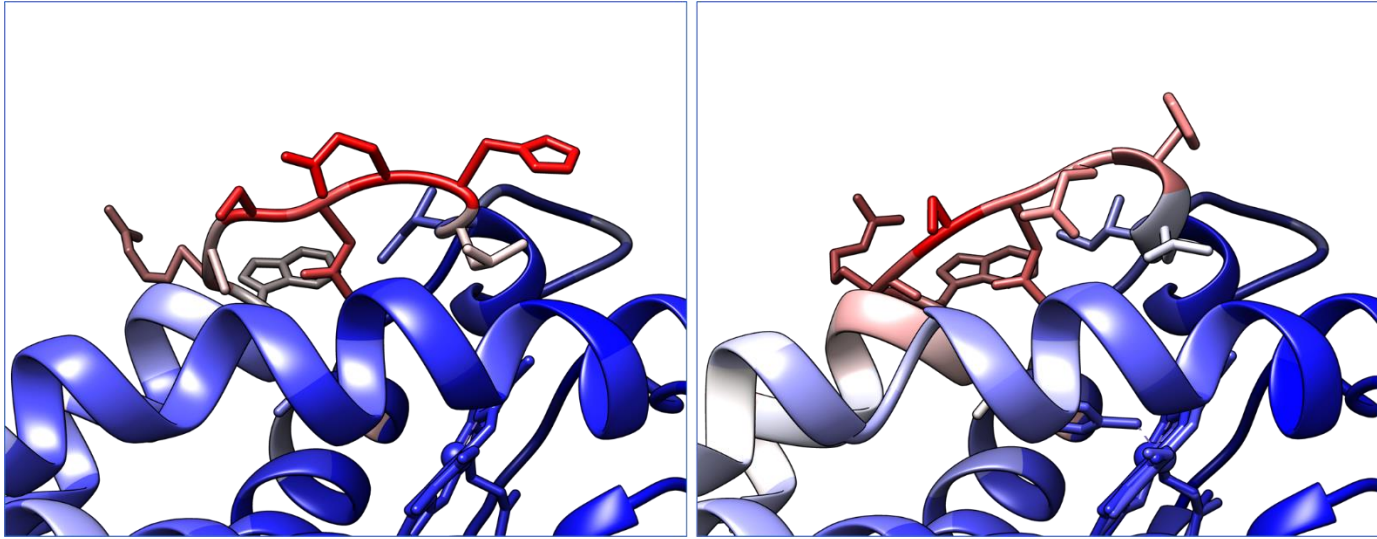

436

437 **Extended Figure 3.** *ApePgb* GLVRSQL (left) and carbene-bound *ApePgb* GLVRSQL (right) showing the average *B*-factors  
438 as a color gradient from blue (*B*-factor 20 or less) to red (*B*-factors 50 or more) in order to highlight the *B*-factor variations  
439 within the protein.

440

441
